# Supplementary material for: Ionothermal synthesis of crystalline metal phosphites using multifunctional protic ionic liquids
Source: Royal Society of Chemistry journal article supplement (doi:10.1039/d0ce01182g), 2020-01-01
Supplement: d0ce01182g1.pdf [file d0ce01182g1.pdf]

**Ionothermal synthesis of crystalline metal phosphites using  
multifunctional protic ionic liquids**

Ting Li, Yumei Mao, Yue Qi,\* Hongmei Zeng, Guohong Zou and Zhien Lin\*

*College of Chemistry, Sichuan University, Chengdu 610064, P. R. China.*

\* To whom correspondence should be addressed. Tel: +86-28-85412284. E-mail:

qiye@scu.edu.cn (Y. Qi); zhienlin@scu.edu.cn (Z. Lin)

### **Physical measurements:**

Powder X-ray diffraction (XRD) data were obtained using a Rigaku D/MAX-rA diffractometer with Cu-K $\alpha$  radiation ( $\lambda = 1.5418 \text{ \AA}$ ). IR spectra (KBr pellets) were recorded on a Nicolet Impact 410 FTIR spectrometer. The thermogravimetric analyses were performed on a Netzsch STA 449c analyzer in a flow of N<sub>2</sub> with a heating rate of 10 °C/min. Magnetic measurement was performed on the Quantum Design SQUID MPMS XL-7 magnetometer in a magnetic field of 1000 Oe in the temperature range of 2-300 K. Alternating current impedance measurements were carried out with a Solartron SI 1260 impedance/gain-phase analyzer over the frequency range from 0.1 Hz to 10 MHz with an applied voltage of 10 mV. The relative humidity was controlled by a STIK Corp. CIHI-150B incubator. The sample was pressed to form a cylindrical pellet of crystalline powder sample (~2 mm thickness  $\times$  5 mm  $\phi$ ) coated with C-pressed electrodes. Two silver electrodes were attached to both sides of pellet to form four end terminals (quasi-four-probe method). Single crystal X-ray diffraction data were collected on a New Gemini, Dual, Cu at zero, EosS2 diffractometer at room temperature. The crystal structures were solved by direct methods. The structures were refined on  $F^2$  by full-matrix least-squares methods using the *SHELXTL* program package.<sup>1</sup>

### *Reference*

1. G. M. Sheldrick, *Acta Cryst., Sect. A*, 2008, 64, 112.

Table S1. Selected bond distances for SCU-17

| bond                     | distance (Å) | bond                     | distance (Å) |
|--------------------------|--------------|--------------------------|--------------|
| Fe(1)-O(1)               | 1.981(3)     | Fe(2)-O(2)               | 2.043(3)     |
| Fe(1)-O(1) <sup>#1</sup> | 1.981(3)     | Fe(2)-O(2) <sup>#5</sup> | 2.043(3)     |
| Fe(1)-O(3) <sup>#2</sup> | 2.010(2)     | Fe(2)-O(4)               | 2.205(3)     |
| Fe(1)-O(3) <sup>#3</sup> | 2.010(2)     | Fe(2)-O(4) <sup>#5</sup> | 2.205(3)     |
| Fe(1)-F(1)               | 1.938(2)     | Fe(2)-F(1) <sup>#3</sup> | 2.072(2)     |
| Fe(1)-F(1) <sup>#1</sup> | 1.938(2)     | Fe(2)-F(1) <sup>#4</sup> | 2.072(2)     |
| <b>Σ VB (Fe-O/F)</b>     | <b>3.076</b> | <b>Σ VB (Fe-O/F)</b>     | <b>2.067</b> |

Their sum SVB appears in bold type at the end of the list of the distances around every cation. Symmetry transformations used to generate equivalent atoms: (#1) -x, 1-y, 1-z; (#2) -1+x, +y, +z; (#3) 1-x, 1-y, 1-z; (#4) 1+x, +y, 1+z; (#5) 2-x, 1-y, 2-z.

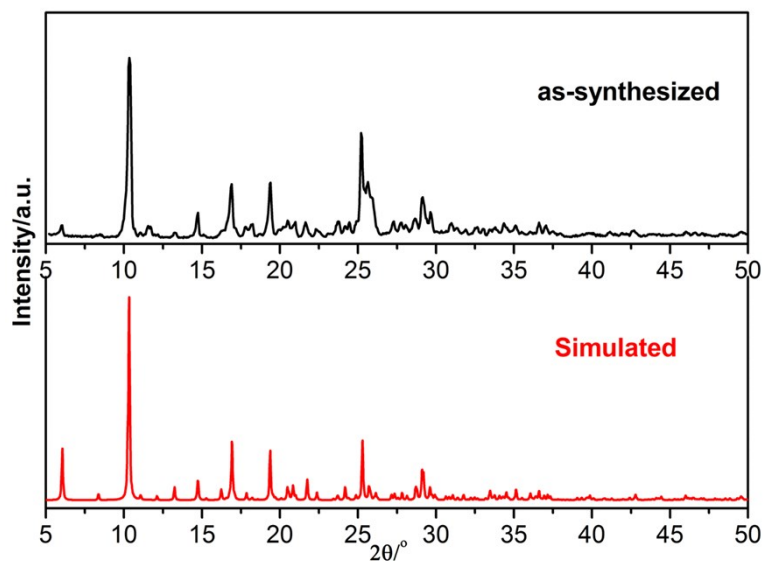

**Fig. S1.** Experimental and simulated powder XRD patterns of SCU-9.

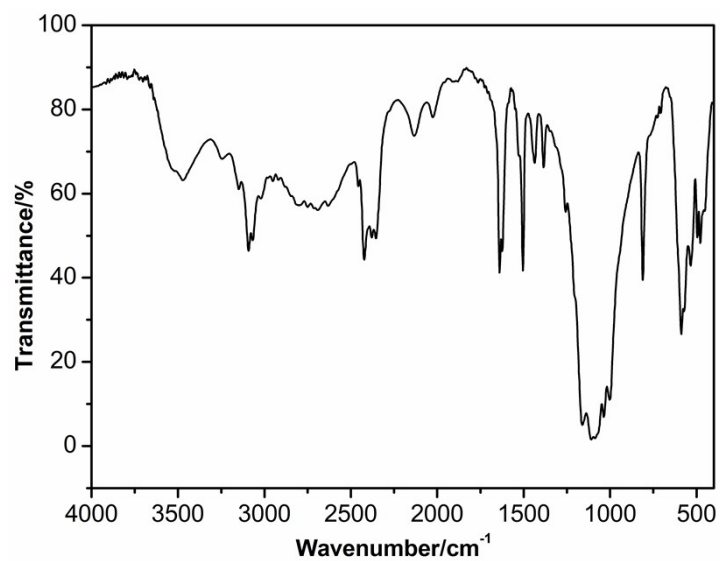

**Fig. S2.** IR spectrum of SCU-9.

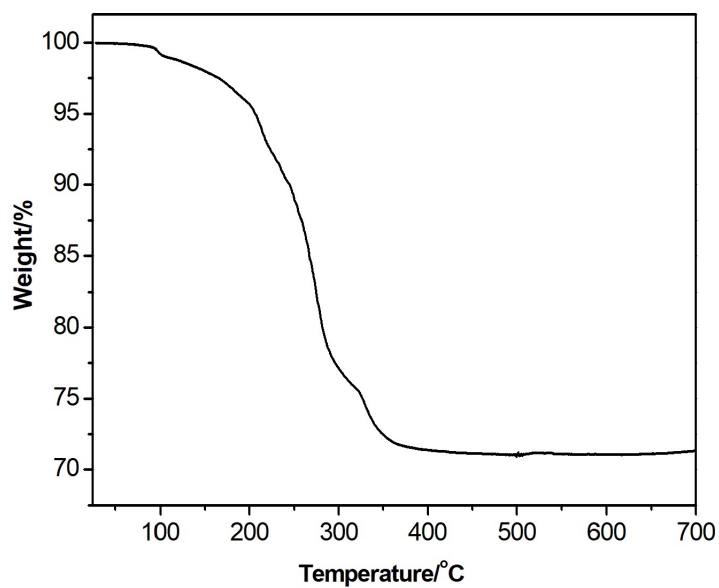

**Fig. S3.** TGA curve of SCU-9.

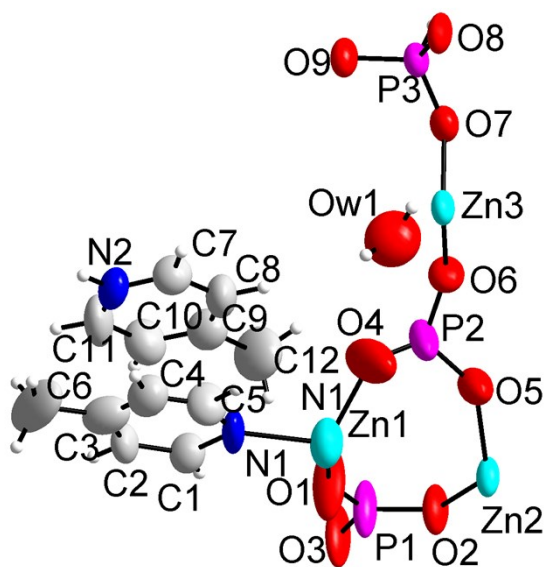

**Fig. S4.** ORTEP plot of the asymmetric unit of SCU-9, showing the labeling scheme and the 50% probability displacement ellipsoid.

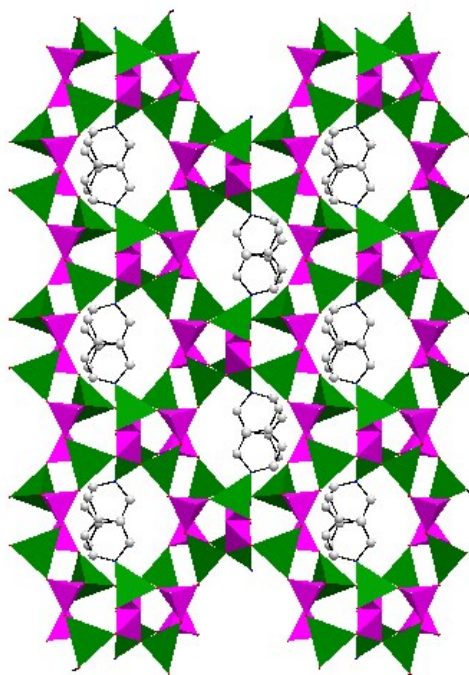

**Fig. S5.** View of the structure of SCU-9 with 12 MR channels along the [001] direction.

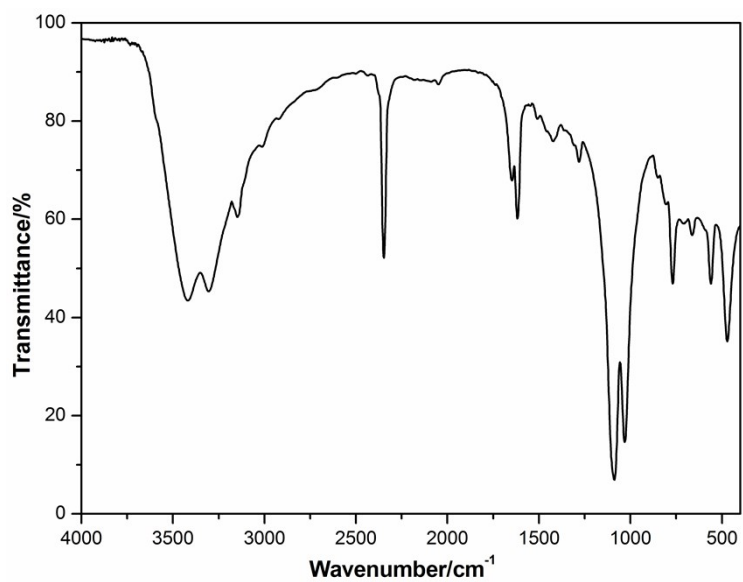

**Fig. S6.** IR spectrum of SCU-17.

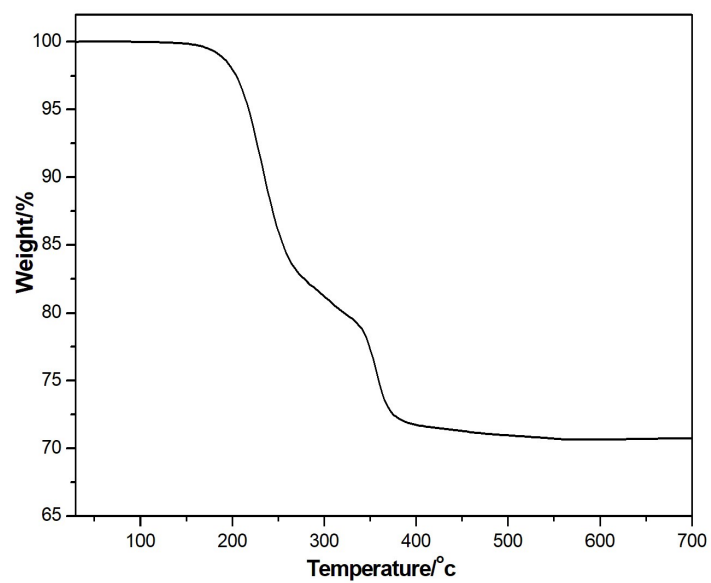

**Fig. S7.** TGA curve of SCU-17.

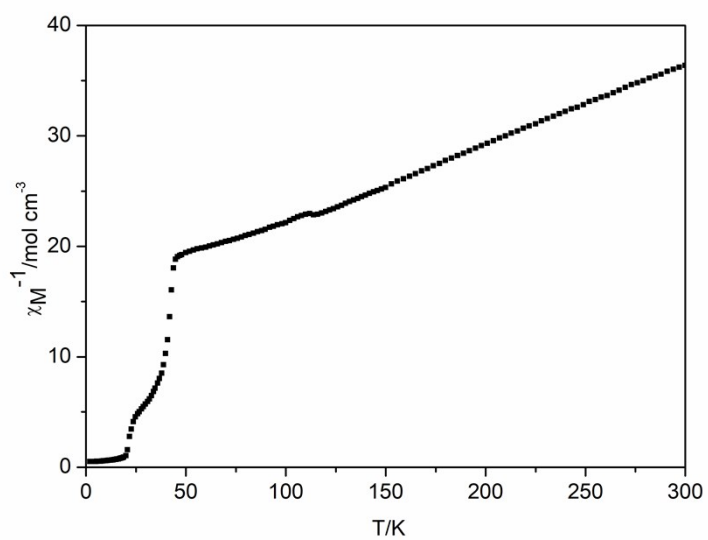

**Fig. S8.** Temperature dependence of  $\chi_M^{-1}$  for SCU-17.

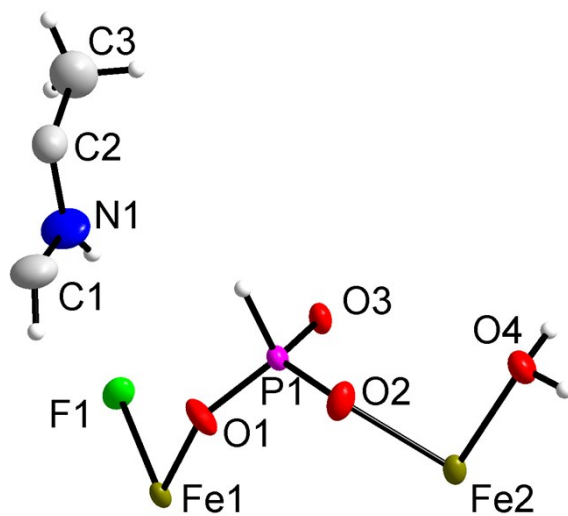

**Fig. S9.** ORTEP plot of the asymmetric unit of SCU-17, showing the labeling scheme and the 50% probability displacement ellipsoid.

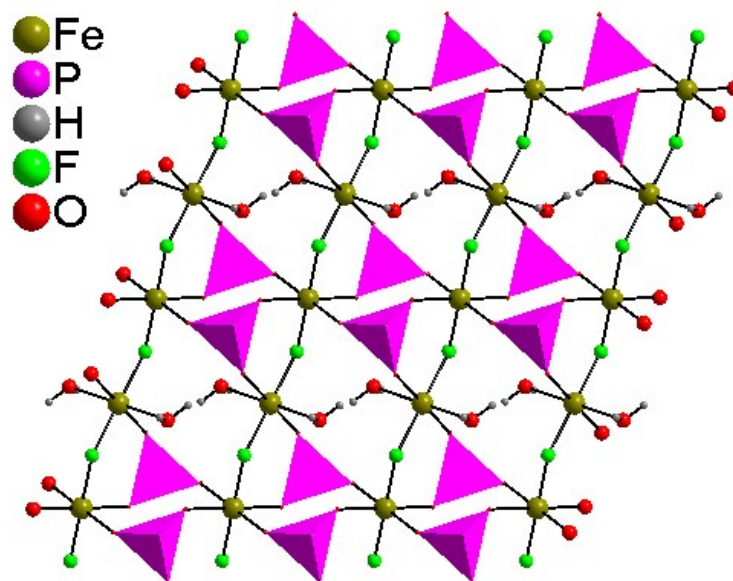

**Fig. S10.** View of the layered structure of SCU-17 showing infinite Fe-F-Fe linkages.
